# Supplementary material
Source: PubMed Central journal article supplement (PMC5980699)
Supplement: NIHMS942459-supplement-Supp_TableS5.pdf [file NIHMS942459-supplement-Supp_TableS5.pdf]

Supplemental Table 5. *PGR* SNPs among African American Women in the WHI-SHARe

| RS #       | CHR | Gene       | OR     | LCL    | UCL    | p        |
|------------|-----|------------|--------|--------|--------|----------|
| rs17096034 | 11  | <i>PGR</i> | 1.022  | 0.921  | 1.133  | 6.9.E-01 |
| rs17096036 | 11  | <i>PGR</i> | 1.021  | 0.9203 | 1.132  | 7.0.E-01 |
| rs12788818 | 11  | <i>PGR</i> | 1.064  | 0.9097 | 1.245  | 4.4.E-01 |
| rs575473   | 11  | <i>PGR</i> | 1.062  | 0.9864 | 1.144  | 1.1.E-01 |
| rs576355   | 11  | <i>PGR</i> | 1.051  | 0.9335 | 1.183  | 4.1.E-01 |
| rs590306   | 11  | <i>PGR</i> | 0.9627 | 0.8939 | 1.037  | 3.2.E-01 |
| rs563202   | 11  | <i>PGR</i> | 1.023  | 0.9372 | 1.117  | 6.1.E-01 |
| rs523332   | 11  | <i>PGR</i> | 1.084  | 1.004  | 1.17   | 3.8.E-02 |
| rs667637   | 11  | <i>PGR</i> | 1.082  | 0.9993 | 1.171  | 5.2.E-02 |
| rs516895   | 11  | <i>PGR</i> | 1.079  | 1      | 1.165  | 4.9.E-02 |
| rs574434   | 11  | <i>PGR</i> | 1.053  | 0.9755 | 1.137  | 1.8.E-01 |
| rs13377359 | 11  | <i>PGR</i> | 1.044  | 0.9336 | 1.167  | 4.5.E-01 |
| rs10895041 | 11  | <i>PGR</i> | 1.125  | 0.9204 | 1.375  | 2.5.E-01 |
| rs660912   | 11  | <i>PGR</i> | 0.9942 | 0.8474 | 1.166  | 9.4.E-01 |
| rs540763   | 11  | <i>PGR</i> | 0.9689 | 0.8249 | 1.138  | 7.0.E-01 |
| rs11224546 | 11  | <i>PGR</i> | 0.9737 | 0.8808 | 1.076  | 6.0.E-01 |
| rs10501970 | 11  | <i>PGR</i> | 0.984  | 0.8927 | 1.085  | 7.5.E-01 |
| rs2219337  | 11  | <i>PGR</i> | 0.9748 | 0.8818 | 1.078  | 6.2.E-01 |
| rs639838   | 11  | <i>PGR</i> | 0.9544 | 0.8875 | 1.026  | 2.1.E-01 |
| rs12281111 | 11  | <i>PGR</i> | 1.043  | 0.9624 | 1.13   | 3.1.E-01 |
| rs10895050 | 11  | <i>PGR</i> | 1.042  | 0.9619 | 1.129  | 3.1.E-01 |
| rs561610   | 11  | <i>PGR</i> | 0.9862 | 0.9055 | 1.074  | 7.5.E-01 |
| rs11571276 | 11  | <i>PGR</i> | 1.214  | 1.042  | 1.414  | 1.3.E-02 |
| rs500760   | 11  | <i>PGR</i> | 1.026  | 0.9524 | 1.106  | 5.0.E-01 |
| rs511298   | 11  | <i>PGR</i> | 1      | 0.9262 | 1.081  | 9.9.E-01 |
| rs572580   | 11  | <i>PGR</i> | 1.026  | 0.9518 | 1.106  | 5.0.E-01 |
| rs11224567 | 11  | <i>PGR</i> | 1.091  | 0.9062 | 1.313  | 3.6.E-01 |
| rs679275   | 11  | <i>PGR</i> | 0.9655 | 0.8978 | 1.038  | 3.4.E-01 |
| rs552916   | 11  | <i>PGR</i> | 0.9695 | 0.9016 | 1.042  | 4.0.E-01 |
| rs540622   | 11  | <i>PGR</i> | 1.023  | 0.9386 | 1.115  | 6.0.E-01 |
| rs693765   | 11  | <i>PGR</i> | 0.8602 | 0.7584 | 0.9757 | 1.9.E-02 |
| rs11571228 | 11  | <i>PGR</i> | 1.044  | 0.8897 | 1.224  | 6.0.E-01 |
| rs6590838  | 11  | <i>PGR</i> | 1.045  | 0.8908 | 1.225  | 5.9.E-01 |
| rs11571215 | 11  | <i>PGR</i> | 0.8886 | 0.7819 | 1.01   | 7.0.E-02 |
| rs660149   | 11  | <i>PGR</i> | 1.012  | 0.9346 | 1.096  | 7.7.E-01 |
| rs11571209 | 11  | <i>PGR</i> | 0.8499 | 0.681  | 1.061  | 1.5.E-01 |
| rs495997   | 11  | <i>PGR</i> | 0.9758 | 0.9071 | 1.05   | 5.1.E-01 |
| rs10895057 | 11  | <i>PGR</i> | 1.005  | 0.8999 | 1.122  | 9.3.E-01 |
| rs2124761  | 11  | <i>PGR</i> | 0.9281 | 0.8427 | 1.022  | 1.3.E-01 |
| rs11224579 | 11  | <i>PGR</i> | 0.9032 | 0.8087 | 1.009  | 7.1.E-02 |
| rs503602   | 11  | <i>PGR</i> | 1.022  | 0.9452 | 1.105  | 5.8.E-01 |
| rs545845   | 11  | <i>PGR</i> | 1.017  | 0.9425 | 1.097  | 6.7.E-01 |
| rs653752   | 11  | <i>PGR</i> | 0.984  | 0.9151 | 1.058  | 6.6.E-01 |
| rs522053   | 11  | <i>PGR</i> | 0.9892 | 0.9194 | 1.064  | 7.7.E-01 |
| rs522819   | 11  | <i>PGR</i> | 1.039  | 0.9172 | 1.177  | 5.5.E-01 |
| rs632542   | 11  | <i>PGR</i> | 1.031  | 0.9103 | 1.169  | 6.3.E-01 |
| rs503362   | 11  | <i>PGR</i> | 1.033  | 0.9568 | 1.116  | 4.0.E-01 |
| rs7116336  | 11  | <i>PGR</i> | 0.9243 | 0.8254 | 1.035  | 1.7.E-01 |
| rs11571177 | 11  | <i>PGR</i> | 0.9088 | 0.7385 | 1.118  | 3.7.E-01 |
| rs481855   | 11  | <i>PGR</i> | 1.023  | 0.9457 | 1.106  | 5.7.E-01 |
| rs555572   | 11  | <i>PGR</i> | 1.028  | 0.9507 | 1.112  | 4.9.E-01 |
| rs555653   | 11  | <i>PGR</i> | 1.01   | 0.9395 | 1.087  | 7.8.E-01 |
| rs1145465  | 11  | <i>PGR</i> | 1.082  | 0.89   | 1.316  | 4.3.E-01 |

|            |    |            |        |        |        |          |
|------------|----|------------|--------|--------|--------|----------|
| rs7106686  | 11 | <i>PGR</i> | 1.013  | 0.9369 | 1.096  | 7.4.E-01 |
| rs541463   | 11 | <i>PGR</i> | 1.104  | 0.9103 | 1.34   | 3.1.E-01 |
| rs565186   | 11 | <i>PGR</i> | 1.089  | 0.8963 | 1.324  | 3.9.E-01 |
| rs485283   | 11 | <i>PGR</i> | 1.006  | 0.8977 | 1.126  | 9.2.E-01 |
| rs562894   | 11 | <i>PGR</i> | 1.088  | 0.8948 | 1.324  | 4.0.E-01 |
| rs492284   | 11 | <i>PGR</i> | 0.8581 | 0.7053 | 1.044  | 1.3.E-01 |
| rs4754732  | 11 | <i>PGR</i> | 0.975  | 0.8638 | 1.1    | 6.8.E-01 |
| rs948516   | 11 | <i>PGR</i> | 0.9716 | 0.8623 | 1.095  | 6.4.E-01 |
| rs11224613 | 11 | <i>PGR</i> | 0.9445 | 0.831  | 1.073  | 3.8.E-01 |
| rs610998   | 11 | <i>PGR</i> | 0.9893 | 0.9129 | 1.072  | 7.9.E-01 |
| rs12274288 | 11 | <i>PGR</i> | 0.9345 | 0.8102 | 1.078  | 3.5.E-01 |
| rs528719   | 11 | <i>PGR</i> | 1.134  | 0.93   | 1.382  | 2.1.E-01 |
| rs10501972 | 11 | <i>PGR</i> | 1.044  | 0.9067 | 1.202  | 5.5.E-01 |
| rs7952140  | 11 | <i>PGR</i> | 0.9355 | 0.8121 | 1.078  | 3.6.E-01 |
| rs7934807  | 11 | <i>PGR</i> | 0.9866 | 0.8492 | 1.146  | 8.6.E-01 |
| rs1942836  | 11 | <i>PGR</i> | 0.9478 | 0.8746 | 1.027  | 1.9.E-01 |
| rs11822746 | 11 | <i>PGR</i> | 1.053  | 0.9149 | 1.213  | 4.7.E-01 |
| rs606386   | 11 | <i>PGR</i> | 0.9595 | 0.861  | 1.069  | 4.5.E-01 |
| rs1892882  | 11 | <i>PGR</i> | 0.9538 | 0.8864 | 1.026  | 2.1.E-01 |
| rs528237   | 11 | <i>PGR</i> | 0.968  | 0.7481 | 1.253  | 8.0.E-01 |
| rs11224621 | 11 | <i>PGR</i> | 1.01   | 0.914  | 1.116  | 8.4.E-01 |
| rs17096375 | 11 | <i>PGR</i> | 0.8613 | 0.6705 | 1.107  | 2.4.E-01 |
| rs538343   | 11 | <i>PGR</i> | 1.152  | 0.9491 | 1.399  | 1.5.E-01 |
| rs17096381 | 11 | <i>PGR</i> | 0.9604 | 0.805  | 1.146  | 6.5.E-01 |
| rs1942845  | 11 | <i>PGR</i> | 1.093  | 0.9902 | 1.206  | 7.8.E-02 |
| rs17737180 | 11 | <i>PGR</i> | 1.047  | 0.9673 | 1.134  | 2.5.E-01 |
| rs2000743  | 11 | <i>PGR</i> | 1.055  | 0.936  | 1.189  | 3.8.E-01 |
| rs7940817  | 11 | <i>PGR</i> | 1.06   | 0.9793 | 1.148  | 1.5.E-01 |
| rs11224629 | 11 | <i>PGR</i> | 0.9515 | 0.8821 | 1.026  | 2.0.E-01 |
| rs12361300 | 11 | <i>PGR</i> | 1.075  | 0.9953 | 1.161  | 6.6.E-02 |
| rs55957770 | 11 | <i>PGR</i> | 1.057  | 0.9631 | 1.159  | 2.4.E-01 |
| rs4121760  | 11 | <i>PGR</i> | 0.9465 | 0.8464 | 1.058  | 3.3.E-01 |
| rs4121759  | 11 | <i>PGR</i> | 0.9142 | 0.7449 | 1.122  | 3.9.E-01 |
| rs7122562  | 11 | <i>PGR</i> | 1.066  | 0.9615 | 1.183  | 2.2.E-01 |
| rs4121835  | 11 | <i>PGR</i> | 0.928  | 0.8625 | 0.9985 | 4.5.E-02 |
| rs12292961 | 11 | <i>PGR</i> | 1.1    | 0.9461 | 1.278  | 2.2.E-01 |
| rs10501974 | 11 | <i>PGR</i> | 0.9621 | 0.8913 | 1.038  | 3.2.E-01 |
| rs2156520  | 11 | <i>PGR</i> | 0.9512 | 0.8553 | 1.058  | 3.6.E-01 |
| rs11224760 | 11 | <i>PGR</i> | 1.124  | 0.8237 | 1.535  | 4.6.E-01 |
| rs4520564  | 11 | <i>PGR</i> | 1.151  | 0.8791 | 1.506  | 3.1.E-01 |
| rs7938729  | 11 | <i>PGR</i> | 0.9359 | 0.8617 | 1.017  | 1.2.E-01 |
| rs6590857  | 11 | <i>PGR</i> | 0.9387 | 0.864  | 1.02   | 1.3.E-01 |
| rs6590858  | 11 | <i>PGR</i> | 0.9377 | 0.8631 | 1.019  | 1.3.E-01 |
| rs11224762 | 11 | <i>PGR</i> | 0.9035 | 0.8391 | 0.9727 | 7.1.E-03 |
| rs11224765 | 11 | <i>PGR</i> | 1.21   | 0.9908 | 1.478  | 6.2.E-02 |
| rs7948940  | 11 | <i>PGR</i> | 0.8942 | 0.8327 | 0.9602 | 2.1.E-03 |
| rs17096697 | 11 | <i>PGR</i> | 0.9109 | 0.8398 | 0.988  | 2.4.E-02 |
| rs12788461 | 11 | <i>PGR</i> | 1.184  | 0.9685 | 1.448  | 9.9.E-02 |
| rs7928922  | 11 | <i>PGR</i> | 0.8957 | 0.8312 | 0.9652 | 3.9.E-03 |

Abbreviations: SNP = single nucleotide polymorphism; CHR, chromosome;  
OR = odds ratio; LCL = lower confidence limit; UCL = upper confidence limit.
