# Supplementary material
Source: PubMed Central journal article supplement (PMC5980699)
Supplement: NIHMS942459-supplement-Supp_TableS6.pdf [file NIHMS942459-supplement-Supp_TableS6.pdf]

Supplemental Table 6. SNPs in PGR among European American Women in the WHI-GARNET

| RS #       | CHR | Gene | OR   | 95% LCL | 95% UCL | p        |
|------------|-----|------|------|---------|---------|----------|
| rs1042838  | 11  | PGR  | 1    | 0.87    | 1.16    | 9.78E-01 |
| rs1046982  | 11  | PGR  | 0.88 | 0.75    | 1.03    | 1.05E-01 |
| rs10501976 | 11  | PGR  | 0.99 | 0.84    | 1.17    | 9.41E-01 |
| rs10791445 | 11  | PGR  | 1.04 | 0.9     | 1.2     | 5.86E-01 |
| rs10791454 | 11  | PGR  | 0.94 | 0.81    | 1.09    | 4.05E-01 |
| rs10895076 | 11  | PGR  | 0.91 | 0.78    | 1.05    | 1.89E-01 |
| rs10895087 | 11  | PGR  | 0.98 | 0.87    | 1.1     | 7.49E-01 |
| rs10895089 | 11  | PGR  | 0.99 | 0.89    | 1.11    | 8.96E-01 |
| rs10895090 | 11  | PGR  | 0.99 | 0.89    | 1.1     | 8.10E-01 |
| rs11224556 | 11  | PGR  | 0.86 | 0.73    | 1.01    | 5.82E-02 |
| rs11224561 | 11  | PGR  | 1.13 | 0.97    | 1.33    | 1.25E-01 |
| rs11224563 | 11  | PGR  | 0.99 | 0.85    | 1.14    | 8.71E-01 |
| rs11224564 | 11  | PGR  | NA   | NA      | NA      | NA       |
| rs11224571 | 11  | PGR  | NA   | NA      | NA      | NA       |
| rs11224579 | 11  | PGR  | 1.08 | 0.9     | 1.3     | 4.15E-01 |
| rs11224619 | 11  | PGR  | NA   | NA      | NA      | NA       |
| rs11224683 | 11  | PGR  | 1.01 | 0.87    | 1.16    | 9.35E-01 |
| rs11224697 | 11  | PGR  | 1.05 | 0.93    | 1.18    | 4.31E-01 |
| rs1144133  | 11  | PGR  | 0.88 | 0.71    | 1.08    | 2.12E-01 |
| rs11571133 | 11  | PGR  | NA   | NA      | NA      | NA       |
| rs11571138 | 11  | PGR  | 1.4  | 0.73    | 2.65    | 3.09E-01 |
| rs11571141 | 11  | PGR  | 1.24 | 0.19    | 7.91    | 8.19E-01 |
| rs11571227 | 11  | PGR  | NA   | NA      | NA      | NA       |
| rs11571247 | 11  | PGR  | 2.72 | 0.32    | 23.54   | 3.62E-01 |
| rs11571271 | 11  | PGR  | 1.19 | 0.83    | 1.71    | 3.40E-01 |
| rs12274270 | 11  | PGR  | 1.1  | 0.19    | 6.39    | 9.17E-01 |
| rs12293922 | 11  | PGR  | NA   | NA      | NA      | NA       |
| rs12361308 | 11  | PGR  | 1    | 0.9     | 1.11    | 9.82E-01 |
| rs12803733 | 11  | PGR  | 0.94 | 0.8     | 1.09    | 4.06E-01 |
| rs12805701 | 11  | PGR  | 0.83 | 0.67    | 1.02    | 7.38E-02 |
| rs1379132  | 11  | PGR  | 0.86 | 0.74    | 1.01    | 6.93E-02 |
| rs17737150 | 11  | PGR  | 0.92 | 0.81    | 1.04    | 1.77E-01 |
| rs17737180 | 11  | PGR  | 1    | 0.9     | 1.12    | 9.58E-01 |
| rs1824128  | 11  | PGR  | 1.07 | 0.93    | 1.25    | 3.44E-01 |
| rs1893505  | 11  | PGR  | 1.03 | 0.92    | 1.15    | 6.02E-01 |
| rs1942836  | 11  | PGR  | 0.97 | 0.85    | 1.12    | 6.91E-01 |
| rs1942845  | 11  | PGR  | 1.08 | 0.96    | 1.22    | 2.10E-01 |
| rs1943760  | 11  | PGR  | 1.01 | 0.9     | 1.12    | 9.25E-01 |
| rs2020880  | 11  | PGR  | NA   | NA      | NA      | NA       |
| rs35538677 | 11  | PGR  | 0.83 | 0.67    | 1.02    | 8.21E-02 |
| rs4304740  | 11  | PGR  | 1    | 0.89    | 1.13    | 9.53E-01 |
| rs471767   | 11  | PGR  | 0.92 | 0.82    | 1.04    | 1.74E-01 |
| rs4754743  | 11  | PGR  | 0.93 | 0.81    | 1.06    | 2.55E-01 |
| rs481855   | 11  | PGR  | 1    | 0.89    | 1.12    | 9.78E-01 |
| rs484389   | 11  | PGR  | 1.08 | 0.95    | 1.22    | 2.47E-01 |
| rs486992   | 11  | PGR  | 0.91 | 0.81    | 1.02    | 1.16E-01 |
| rs492284   | 11  | PGR  | 0.51 | 0.03    | 8.35    | 6.40E-01 |
| rs492827   | 11  | PGR  | 1.07 | 0.95    | 1.22    | 2.56E-01 |
| rs493220   | 11  | PGR  | 1.05 | 0.94    | 1.17    | 3.86E-01 |
| rs495997   | 11  | PGR  | 1.01 | 0.91    | 1.13    | 8.41E-01 |
| rs500760   | 11  | PGR  | 1.08 | 0.95    | 1.22    | 2.54E-01 |
| rs503602   | 11  | PGR  | 0.92 | 0.78    | 1.07    | 2.79E-01 |

|           |    |            |      |      |      |          |
|-----------|----|------------|------|------|------|----------|
| rs518162  | 11 | <i>PGR</i> | 1.07 | 0.87 | 1.31 | 5.07E-01 |
| rs522053  | 11 | <i>PGR</i> | 0.95 | 0.85 | 1.07 | 4.33E-01 |
| rs529808  | 11 | <i>PGR</i> | 1.08 | 0.96 | 1.22 | 2.16E-01 |
| rs538915  | 11 | <i>PGR</i> | 0.93 | 0.79 | 1.1  | 4.01E-01 |
| rs543215  | 11 | <i>PGR</i> | 0.92 | 0.8  | 1.06 | 2.63E-01 |
| rs550382  | 11 | <i>PGR</i> | 0.93 | 0.82 | 1.05 | 2.54E-01 |
| rs553272  | 11 | <i>PGR</i> | 1.16 | 0.95 | 1.41 | 1.42E-01 |
| rs555653  | 11 | <i>PGR</i> | 1    | 0.9  | 1.11 | 9.49E-01 |
| rs561610  | 11 | <i>PGR</i> | 1.13 | 1    | 1.27 | 4.55E-02 |
| rs568157  | 11 | <i>PGR</i> | 1.06 | 0.95 | 1.18 | 3.27E-01 |
| rs585447  | 11 | <i>PGR</i> | 0.99 | 0.86 | 1.15 | 9.07E-01 |
| rs600692  | 11 | <i>PGR</i> | 1.2  | 0.99 | 1.45 | 6.69E-02 |
| rs608995  | 11 | <i>PGR</i> | 0.92 | 0.81 | 1.04 | 1.92E-01 |
| rs614670  | 11 | <i>PGR</i> | 0.95 | 0.86 | 1.06 | 3.87E-01 |
| rs639838  | 11 | <i>PGR</i> | 0.9  | 0.8  | 1.01 | 6.89E-02 |
| rs6590842 | 11 | <i>PGR</i> | 1.13 | 0.85 | 1.49 | 4.03E-01 |
| rs660541  | 11 | <i>PGR</i> | 1.01 | 0.91 | 1.13 | 8.07E-01 |
| rs679275  | 11 | <i>PGR</i> | 1.09 | 0.96 | 1.23 | 1.89E-01 |
| rs7114792 | 11 | <i>PGR</i> | 1.11 | 0.98 | 1.26 | 1.09E-01 |
| rs7128860 | 11 | <i>PGR</i> | 0.91 | 0.8  | 1.03 | 1.39E-01 |
| rs7928290 | 11 | <i>PGR</i> | 0.68 | 0.36 | 1.29 | 2.36E-01 |
| rs7934807 | 11 | <i>PGR</i> | 1.56 | 0.52 | 4.73 | 4.27E-01 |
| rs7936649 | 11 | <i>PGR</i> | 0.91 | 0.81 | 1.02 | 1.21E-01 |
| rs7939109 | 11 | <i>PGR</i> | NA   | NA   | NA   | NA       |
| rs7940817 | 11 | <i>PGR</i> | 0.93 | 0.82 | 1.05 | 2.46E-01 |
| rs7941363 | 11 | <i>PGR</i> | 0.53 | 0.1  | 2.69 | 4.44E-01 |
| rs9282825 | 11 | <i>PGR</i> | NA   | NA   | NA   | NA       |
| rs948516  | 11 | <i>PGR</i> | 1.06 | 0.94 | 1.19 | 3.33E-01 |
| rs948749  | 11 | <i>PGR</i> | 0.92 | 0.7  | 1.21 | 5.34E-01 |
| rs951936  | 11 | <i>PGR</i> | 0.92 | 0.61 | 1.39 | 7.08E-01 |

Abbreviations: SNP = single nucleotide polymorphism; CHR, chromosome;  
GARNET = Genomics and Randomized Trials Network; NA = not available  
OR = odds ratio; LCL = lower confidence limit; UCL = upper confidence limit.
