# Supplementary material
Source: PubMed Central journal article supplement (PMC5980699)
Supplement: NIHMS942459-supplement-Supp_TableS7.pdf [file NIHMS942459-supplement-Supp_TableS7.pdf]

Supplemental Table 7. SNPs with linkage disequilibrium with rs948516 in the SIGMA and DIAGRAM

| RS #        | r <sup>2</sup> | D' | p (SIGMA) | OR (SIGMA) | p (DIAGRAM) | OR (DIAGRAM) |
|-------------|----------------|----|-----------|------------|-------------|--------------|
| rs948516    |                | 1  | 0.337     | 0.964      | 0.11        | 0.971        |
| rs4754732   |                | 1  | 0.318     | 0.962      | 0.1         | 0.971        |
| rs113655763 |                | 1  | 0.344     | 0.964      | 0.42        | 0.98         |
| rs55812053  |                | 1  | 0.344     | 0.964      | 0.13        | 0.909        |
| rs141515035 |                | 1  | 0.359     | 0.966      | 0.13        | 0.909        |
| rs144251277 |                | 1  | 0.345     | 0.965      | 0.13        | 0.909        |
| rs67551904  |                | 1  | 0.345     | 0.965      | 0.13        | 0.909        |
| rs55915704  |                | 1  | 0.327     | 0.963      | 0.018       | 0.962        |
| rs56230407  |                | 1  | 0.325     | 0.963      | 0.42        | 0.98         |
| rs72999403  |                | 1  | 0.342     | 0.964      | 0.017       | 0.962        |
| rs1938952   |                | 1  | 0.268     | 0.958      | 0.42        | 0.98         |
| rs1938953   |                | 1  | 0.327     | 0.963      | 0.94        | 1.01         |
| rs10501971  |                | 1  | 0.279     | 0.959      | 0.22        | 0.98         |
| rs10501972  |                | 1  | 0.273     | 0.959      | 0.088       | 0.971        |
| rs4268474   |                | 1  | 0.273     | 0.959      | 0.17        | 0.971        |
| rs17657984  |                | 1  | 0.323     | 0.963      | 0.16        | 0.971        |
| rs17657994  |                | 1  | 0.316     | 0.962      | 0.016       | 0.962        |
| rs7946218   |                | 1  | 0.278     | 0.959      | 0.12        | 0.971        |
| rs4754736   |                | 1  | 0.209     | 0.953      | 0.18        | 1.05         |
| rs66931960  | 0.9475         | 1  | 0.317     | 0.962      | 0.16        | 0.971        |
| rs7934103   | 0.9475         | 1  | 0.207     | 0.952      | 0.85        | 1            |
| rs113503627 | 0.9456         | 1  | 0.307     | 0.961      | 0.17        | 0.971        |
| rs112513363 | 0.9456         | 1  | 0.442     | 0.97       | 0.68        | 0.99         |
| rs1942846   | 0.9456         | 1  | 0.315     | 0.962      | 0.41        | 0.98         |
| rs72976138  | 0.9456         | 1  | 0.324     | 0.962      | 0.27        | 0.98         |
| rs10501973  | 0.9456         | 1  | 0.354     | 0.965      | 0.41        | 0.98         |
| rs17737091  | 0.9456         | 1  | 0.371     | 0.966      | 0.42        | 0.98         |
| rs55962215  | 0.9456         | 1  | 0.365     | 0.966      | 0.76        | 0.99         |
| rs72976145  | 0.9456         | 1  | 0.404     | 0.968      | 0.93        | 1            |
| rs139326627 | 0.9456         | 1  | 0.404     | 0.968      | 0.93        | 1            |
| rs17737234  | 0.9456         | 1  | 0.417     | 0.969      | 0.32        | 0.98         |
| rs1942835   | 0.9456         | 1  | 0.405     | 0.968      | 0.42        | 0.98         |
| rs17737362  | 0.9456         | 1  | 0.384     | 0.967      | 0.32        | 0.98         |
| rs55963819  | 0.9456         | 1  | 0.384     | 0.967      | 0.32        | 0.98         |
| rs72976165  | 0.9456         | 1  | 0.42      | 0.969      | 0.4         | 0.962        |
| rs72976167  | 0.9456         | 1  | 0.399     | 0.968      | 0.4         | 0.962        |
| rs56018629  | 0.9456         | 1  | 0.412     | 0.969      | 0.62        | 1.01         |
| rs4536177   | 0.9456         | 1  | 0.401     | 0.968      | 0.83        | 1            |
| rs72976176  | 0.9456         | 1  | 0.382     | 0.967      | 0.25        | 0.971        |
| rs56409503  | 0.9456         | 1  | 0.4       | 0.968      | 0.79        | 0.99         |
| rs374962669 | 0.9456         | 1  | 0.95      | 0.994      | 0.79        | 0.99         |
| rs56228744  | 0.9456         | 1  | 0.31      | 1.05       | 0.25        | 1.02         |
| rs1943752   | 0.9456         | 1  | 0.411     | 0.969      | 0.47        | 0.99         |
| rs72976194  | 0.9456         | 1  | 0.423     | 0.969      | 0.96        | 1            |
| rs72976196  | 0.9456         | 1  | 0.413     | 0.969      | 0.87        | 1.01         |
| rs111455821 | 0.9456         | 1  | 0.392     | 0.967      | 0.87        | 1.01         |
| rs4754739   | 0.9456         | 1  | 0.434     | 0.97       | 0.87        | 1.01         |
| rs4754006   | 0.9456         | 1  | 0.407     | 0.968      | 0.87        | 1.01         |
| rs140321454 | 0.9456         | 1  | 0.407     | 0.968      | 0.87        | 1.01         |
| rs7932528   | 0.9456         | 1  | 0.425     | 0.969      | 0.87        | 1.01         |
| rs56273028  | 0.9456         | 1  | 0.371     | 0.966      | 0.87        | 1.01         |
| rs7943375   | 0.9456         | 1  | 0.372     | 0.966      | 0.14        | 0.943        |
| rs137951493 | 0.9456         | 1  | 0.368     | 0.966      | 0.64        | 0.99         |

|             |        |        |       |       |      |      |
|-------------|--------|--------|-------|-------|------|------|
| rs56257915  | 0.9456 | 1      | 0.958 | 0.998 | 0.97 | 1    |
| rs113181076 | 0.9456 | 1      | 0.404 | 0.968 | 0.97 | 1    |
| rs112035506 | 0.9456 | 1      | 0.406 | 0.968 | 0.97 | 1    |
| rs138611027 | 0.9456 | 1      | 0.978 | 0.995 | 0.79 | 0.99 |
| rs1942845   | 0.8932 | 0.9451 | 0.211 | 0.953 | 0.27 | 0.98 |
| rs4439480   | 0.8932 | 0.9451 | 0.219 | 0.953 | 0.27 | 0.98 |
| rs11224624  | 0.8932 | 0.9451 | 0.232 | 0.955 | 0.4  | 0.98 |
| rs11404247  | 0.8932 | 0.9451 | 0.847 | 1.01  | 0.47 | 1.01 |
| rs72976155  | 0.8932 | 0.9451 | 0.377 | 0.966 | 0.27 | 1.02 |
| rs147082733 | 0.8932 | 0.9451 | 0.987 | 1     | 0.37 | 0.98 |

\*D' and  $r^2$  with rs948516 were calculated using the Mexican ancestry samples from 1000 Genomes phase 3.

Abbreviations: SNP = single nucleotide polymorphism;

DIAGRAM = DIAbetes Genetics Replication and Meta-analysis; OR = odds ratio;

SIGMA = Slim Initiative in Genomic Medicine for the Americas.
