# Supplementary material
Source: PubMed Central journal article supplement (PMC5980699)
Supplement: NIHMS942459-supplement-Supp_TableS8.pdf [file NIHMS942459-supplement-Supp_TableS8.pdf]

Supplemental Table 8. SNPs in PGR among African American Women in the MEDIA

| RS #       | CHR | Gene | OR    | 95% LCL | 95% UCL | p        |
|------------|-----|------|-------|---------|---------|----------|
| rs1042838  | 11  | PGR  | 0.978 | 0.801   | 1.195   | 8.30E-01 |
| rs1042839  | 11  | PGR  | 0.945 | 0.768   | 1.164   | 5.97E-01 |
| rs1046982  | 11  | PGR  | 0.983 | 0.926   | 1.045   | 5.89E-01 |
| rs10501969 | 11  | PGR  | 0.922 | 0.745   | 1.142   | 4.58E-01 |
| rs10501970 | 11  | PGR  | 0.962 | 0.895   | 1.034   | 2.88E-01 |
| rs10895040 | 11  | PGR  | 1.060 | 0.975   | 1.152   | 1.75E-01 |
| rs10895041 | 11  | PGR  | 1.024 | 0.841   | 1.247   | 8.13E-01 |
| rs10895046 | 11  | PGR  | 0.966 | 0.898   | 1.039   | 3.51E-01 |
| rs10895047 | 11  | PGR  | 1.041 | 0.967   | 1.120   | 2.85E-01 |
| rs10895048 | 11  | PGR  | 1.040 | 0.967   | 1.119   | 2.87E-01 |
| rs10895050 | 11  | PGR  | 1.046 | 0.985   | 1.109   | 1.42E-01 |
| rs10895055 | 11  | PGR  | 0.978 | 0.787   | 1.216   | 8.44E-01 |
| rs10895057 | 11  | PGR  | 0.968 | 0.891   | 1.052   | 4.44E-01 |
| rs10895058 | 11  | PGR  | 1.044 | 0.956   | 1.140   | 3.38E-01 |
| rs10895063 | 11  | PGR  | 0.982 | 0.928   | 1.040   | 5.39E-01 |
| rs10895065 | 11  | PGR  | 1.003 | 0.946   | 1.063   | 9.20E-01 |
| rs11224542 | 11  | PGR  | 1.008 | 0.925   | 1.099   | 8.59E-01 |
| rs11224546 | 11  | PGR  | 0.961 | 0.893   | 1.033   | 2.80E-01 |
| rs11224552 | 11  | PGR  | 1.038 | 0.970   | 1.111   | 2.86E-01 |
| rs11224556 | 11  | PGR  | 0.949 | 0.876   | 1.029   | 2.02E-01 |
| rs11224561 | 11  | PGR  | 1.056 | 0.915   | 1.219   | 4.58E-01 |
| rs11224563 | 11  | PGR  | 0.930 | 0.763   | 1.133   | 4.69E-01 |
| rs11224567 | 11  | PGR  | 1.081 | 0.891   | 1.311   | 4.29E-01 |
| rs11224575 | 11  | PGR  | 1.041 | 0.960   | 1.129   | 3.31E-01 |
| rs11224579 | 11  | PGR  | 1.010 | 0.931   | 1.096   | 8.14E-01 |
| rs11224580 | 11  | PGR  | 1.049 | 0.963   | 1.143   | 2.69E-01 |
| rs11224589 | 11  | PGR  | 0.984 | 0.928   | 1.043   | 5.83E-01 |
| rs11224592 | 11  | PGR  | 0.997 | 0.940   | 1.056   | 9.09E-01 |
| rs11224598 | 11  | PGR  | 0.996 | 0.940   | 1.056   | 8.98E-01 |
| rs1144133  | 11  | PGR  | 0.986 | 0.872   | 1.114   | 8.20E-01 |
| rs1145455  | 11  | PGR  | 1.016 | 0.912   | 1.131   | 7.74E-01 |
| rs1145460  | 11  | PGR  | 1.036 | 0.979   | 1.095   | 2.20E-01 |
| rs1145463  | 11  | PGR  | 0.971 | 0.877   | 1.075   | 5.76E-01 |
| rs1145465  | 11  | PGR  | 1.067 | 0.877   | 1.300   | 5.15E-01 |
| rs11571171 | 11  | PGR  | 0.967 | 0.894   | 1.046   | 4.03E-01 |
| rs11571201 | 11  | PGR  | 1.003 | 0.808   | 1.246   | 9.78E-01 |
| rs11571253 | 11  | PGR  | 0.979 | 0.735   | 1.305   | 8.85E-01 |
| rs11571259 | 11  | PGR  | 1.073 | 0.863   | 1.334   | 5.26E-01 |
| rs12222890 | 11  | PGR  | 0.966 | 0.898   | 1.040   | 3.59E-01 |
| rs12223660 | 11  | PGR  | 0.960 | 0.888   | 1.037   | 2.95E-01 |
| rs12281111 | 11  | PGR  | 1.047 | 0.987   | 1.111   | 1.29E-01 |
| rs12284481 | 11  | PGR  | 0.946 | 0.848   | 1.054   | 3.14E-01 |
| rs12288780 | 11  | PGR  | 1.005 | 0.903   | 1.119   | 9.23E-01 |
| rs12364291 | 11  | PGR  | 0.935 | 0.754   | 1.159   | 5.40E-01 |
| rs1237295  | 11  | PGR  | 0.975 | 0.794   | 1.197   | 8.08E-01 |
| rs1379131  | 11  | PGR  | 1.023 | 0.943   | 1.110   | 5.90E-01 |
| rs1379132  | 11  | PGR  | 0.966 | 0.896   | 1.041   | 3.64E-01 |
| rs1379133  | 11  | PGR  | 0.966 | 0.896   | 1.041   | 3.62E-01 |
| rs1456762  | 11  | PGR  | 1.028 | 0.969   | 1.091   | 3.53E-01 |
| rs1456765  | 11  | PGR  | 0.995 | 0.936   | 1.056   | 8.58E-01 |
| rs17728593 | 11  | PGR  | 1.040 | 0.929   | 1.164   | 4.99E-01 |
| rs17728653 | 11  | PGR  | 1.042 | 0.930   | 1.166   | 4.79E-01 |

|           |    |     |       |       |       |          |
|-----------|----|-----|-------|-------|-------|----------|
| rs1824126 | 11 | PGR | 1.010 | 0.952 | 1.072 | 7.39E-01 |
| rs1824128 | 11 | PGR | 1.019 | 0.938 | 1.106 | 6.60E-01 |
| rs1870019 | 11 | PGR | 0.971 | 0.858 | 1.099 | 6.43E-01 |
| rs2212999 | 11 | PGR | 0.961 | 0.893 | 1.033 | 2.81E-01 |
| rs2219337 | 11 | PGR | 0.959 | 0.891 | 1.032 | 2.60E-01 |
| rs4478959 | 11 | PGR | 0.954 | 0.899 | 1.012 | 1.18E-01 |
| rs471767  | 11 | PGR | 1.005 | 0.937 | 1.078 | 8.86E-01 |
| rs473906  | 11 | PGR | 1.033 | 0.882 | 1.210 | 6.86E-01 |
| rs474320  | 11 | PGR | 1.065 | 0.849 | 1.337 | 5.85E-01 |
| rs4753989 | 11 | PGR | 1.032 | 0.920 | 1.159 | 5.88E-01 |
| rs4753996 | 11 | PGR | 1.026 | 0.967 | 1.089 | 3.91E-01 |
| rs4754717 | 11 | PGR | 0.943 | 0.872 | 1.021 | 1.49E-01 |
| rs4754719 | 11 | PGR | 1.044 | 0.983 | 1.110 | 1.62E-01 |
| rs4754732 | 11 | PGR | 1.007 | 0.915 | 1.107 | 8.93E-01 |
| rs477266  | 11 | PGR | 0.989 | 0.875 | 1.118 | 8.62E-01 |
| rs477794  | 11 | PGR | 1.024 | 0.962 | 1.090 | 4.52E-01 |
| rs478850  | 11 | PGR | 1.036 | 0.979 | 1.095 | 2.19E-01 |
| rs479210  | 11 | PGR | 1.063 | 0.850 | 1.328 | 5.93E-01 |
| rs479259  | 11 | PGR | 0.988 | 0.794 | 1.230 | 9.14E-01 |
| rs480851  | 11 | PGR | 0.996 | 0.899 | 1.102 | 9.36E-01 |
| rs481855  | 11 | PGR | 0.986 | 0.928 | 1.046 | 6.32E-01 |
| rs481883  | 11 | PGR | 1.010 | 0.908 | 1.125 | 8.49E-01 |
| rs482765  | 11 | PGR | 1.013 | 0.816 | 1.257 | 9.05E-01 |
| rs485283  | 11 | PGR | 0.993 | 0.906 | 1.089 | 8.88E-01 |
| rs485795  | 11 | PGR | 0.981 | 0.812 | 1.186 | 8.43E-01 |
| rs486992  | 11 | PGR | 1.035 | 0.977 | 1.096 | 2.45E-01 |
| rs489397  | 11 | PGR | 1.008 | 0.951 | 1.067 | 7.99E-01 |
| rs491722  | 11 | PGR | 1.046 | 0.927 | 1.180 | 4.67E-01 |
| rs492457  | 11 | PGR | 0.982 | 0.929 | 1.038 | 5.23E-01 |
| rs492599  | 11 | PGR | 1.012 | 0.893 | 1.146 | 8.53E-01 |
| rs492827  | 11 | PGR | 1.018 | 0.954 | 1.086 | 5.96E-01 |
| rs493220  | 11 | PGR | 0.979 | 0.885 | 1.084 | 6.87E-01 |
| rs493508  | 11 | PGR | 1.016 | 0.866 | 1.192 | 8.46E-01 |
| rs493957  | 11 | PGR | 1.004 | 0.917 | 1.100 | 9.31E-01 |
| rs495029  | 11 | PGR | 1.008 | 0.951 | 1.068 | 7.91E-01 |
| rs495391  | 11 | PGR | 1.012 | 0.955 | 1.073 | 6.85E-01 |
| rs495997  | 11 | PGR | 0.986 | 0.932 | 1.042 | 6.08E-01 |
| rs496208  | 11 | PGR | 0.991 | 0.935 | 1.050 | 7.48E-01 |
| rs499590  | 11 | PGR | 1.009 | 0.942 | 1.081 | 7.99E-01 |
| rs500112  | 11 | PGR | 1.016 | 0.937 | 1.102 | 6.96E-01 |
| rs500327  | 11 | PGR | 1.015 | 0.957 | 1.076 | 6.20E-01 |
| rs500760  | 11 | PGR | 1.018 | 0.963 | 1.076 | 5.31E-01 |
| rs501732  | 11 | PGR | 0.979 | 0.907 | 1.058 | 5.93E-01 |
| rs502465  | 11 | PGR | 1.002 | 0.940 | 1.069 | 9.41E-01 |
| rs503362  | 11 | PGR | 0.976 | 0.919 | 1.037 | 4.35E-01 |
| rs503602  | 11 | PGR | 1.000 | 0.942 | 1.061 | 9.95E-01 |
| rs503733  | 11 | PGR | 0.986 | 0.930 | 1.046 | 6.42E-01 |
| rs504372  | 11 | PGR | 0.972 | 0.912 | 1.035 | 3.70E-01 |
| rs504402  | 11 | PGR | 0.961 | 0.904 | 1.022 | 2.06E-01 |
| rs505819  | 11 | PGR | 0.958 | 0.792 | 1.159 | 6.57E-01 |
| rs506487  | 11 | PGR | 1.020 | 0.931 | 1.118 | 6.69E-01 |
| rs507141  | 11 | PGR | 1.084 | 0.875 | 1.343 | 4.60E-01 |
| rs508533  | 11 | PGR | 1.002 | 0.947 | 1.060 | 9.50E-01 |
| rs508653  | 11 | PGR | 1.004 | 0.943 | 1.068 | 9.07E-01 |

|          |    |     |       |       |       |          |
|----------|----|-----|-------|-------|-------|----------|
| rs511298 | 11 | PGR | 0.993 | 0.937 | 1.052 | 8.10E-01 |
| rs511484 | 11 | PGR | 0.992 | 0.935 | 1.052 | 7.78E-01 |
| rs516693 | 11 | PGR | 0.996 | 0.936 | 1.060 | 9.02E-01 |
| rs518162 | 11 | PGR | 0.953 | 0.889 | 1.022 | 1.74E-01 |
| rs518382 | 11 | PGR | 0.964 | 0.911 | 1.019 | 1.97E-01 |
| rs519220 | 11 | PGR | 1.031 | 0.912 | 1.166 | 6.25E-01 |
| rs519792 | 11 | PGR | 0.987 | 0.933 | 1.044 | 6.48E-01 |
| rs520017 | 11 | PGR | 1.057 | 0.855 | 1.305 | 6.10E-01 |
| rs521488 | 11 | PGR | 1.001 | 0.935 | 1.071 | 9.82E-01 |
| rs521744 | 11 | PGR | 1.011 | 0.954 | 1.071 | 7.10E-01 |
| rs523231 | 11 | PGR | 0.995 | 0.940 | 1.054 | 8.67E-01 |
| rs523323 | 11 | PGR | 1.015 | 0.956 | 1.078 | 6.23E-01 |
| rs523332 | 11 | PGR | 0.997 | 0.941 | 1.056 | 9.14E-01 |
| rs523535 | 11 | PGR | 0.969 | 0.873 | 1.076 | 5.59E-01 |
| rs523670 | 11 | PGR | 1.004 | 0.947 | 1.065 | 8.96E-01 |
| rs528673 | 11 | PGR | 0.991 | 0.895 | 1.098 | 8.65E-01 |
| rs528719 | 11 | PGR | 1.020 | 0.838 | 1.241 | 8.46E-01 |
| rs529359 | 11 | PGR | 0.991 | 0.931 | 1.054 | 7.69E-01 |
| rs529808 | 11 | PGR | 1.014 | 0.947 | 1.085 | 6.89E-01 |
| rs537120 | 11 | PGR | 0.989 | 0.873 | 1.120 | 8.62E-01 |
| rs537681 | 11 | PGR | 1.010 | 0.949 | 1.075 | 7.60E-01 |
| rs538168 | 11 | PGR | 0.989 | 0.873 | 1.120 | 8.56E-01 |
| rs538915 | 11 | PGR | 1.001 | 0.920 | 1.089 | 9.78E-01 |
| rs540622 | 11 | PGR | 0.960 | 0.898 | 1.026 | 2.27E-01 |
| rs540763 | 11 | PGR | 1.030 | 0.911 | 1.163 | 6.39E-01 |
| rs541463 | 11 | PGR | 1.034 | 0.848 | 1.260 | 7.41E-01 |
| rs542384 | 11 | PGR | 1.019 | 0.963 | 1.077 | 5.21E-01 |
| rs542491 | 11 | PGR | 1.037 | 0.977 | 1.101 | 2.33E-01 |
| rs543215 | 11 | PGR | 1.014 | 0.959 | 1.072 | 6.29E-01 |
| rs543936 | 11 | PGR | 0.988 | 0.935 | 1.045 | 6.77E-01 |
| rs545835 | 11 | PGR | 0.976 | 0.913 | 1.043 | 4.69E-01 |
| rs545845 | 11 | PGR | 0.978 | 0.922 | 1.036 | 4.46E-01 |
| rs546289 | 11 | PGR | 1.010 | 0.892 | 1.144 | 8.72E-01 |
| rs546763 | 11 | PGR | 0.980 | 0.927 | 1.037 | 4.88E-01 |
| rs547378 | 11 | PGR | 0.986 | 0.930 | 1.046 | 6.45E-01 |
| rs547565 | 11 | PGR | 0.967 | 0.875 | 1.068 | 5.06E-01 |
| rs548711 | 11 | PGR | 1.035 | 0.842 | 1.272 | 7.46E-01 |
| rs550382 | 11 | PGR | 0.985 | 0.930 | 1.043 | 5.97E-01 |
| rs550778 | 11 | PGR | 1.004 | 0.917 | 1.100 | 9.28E-01 |
| rs552916 | 11 | PGR | 0.983 | 0.930 | 1.040 | 5.57E-01 |
| rs553272 | 11 | PGR | 1.017 | 0.956 | 1.083 | 5.88E-01 |
| rs555572 | 11 | PGR | 1.012 | 0.952 | 1.076 | 7.08E-01 |
| rs555653 | 11 | PGR | 0.988 | 0.935 | 1.044 | 6.66E-01 |
| rs556238 | 11 | PGR | 1.009 | 0.952 | 1.070 | 7.53E-01 |
| rs557052 | 11 | PGR | 1.012 | 0.955 | 1.073 | 6.85E-01 |
| rs558959 | 11 | PGR | 1.030 | 0.973 | 1.090 | 3.11E-01 |
| rs559763 | 11 | PGR | 0.996 | 0.939 | 1.056 | 8.91E-01 |
| rs560291 | 11 | PGR | 1.004 | 0.907 | 1.111 | 9.43E-01 |
| rs561610 | 11 | PGR | 0.985 | 0.923 | 1.052 | 6.58E-01 |
| rs562894 | 11 | PGR | 0.977 | 0.802 | 1.190 | 8.17E-01 |
| rs563202 | 11 | PGR | 0.927 | 0.868 | 0.989 | 2.22E-02 |
| rs563656 | 11 | PGR | 1.019 | 0.963 | 1.079 | 5.13E-01 |
| rs565186 | 11 | PGR | 0.978 | 0.803 | 1.191 | 8.25E-01 |
| rs566761 | 11 | PGR | 0.989 | 0.873 | 1.120 | 8.61E-01 |

|           |    |     |       |       |       |          |
|-----------|----|-----|-------|-------|-------|----------|
| rs568157  | 11 | PGR | 0.987 | 0.929 | 1.049 | 6.70E-01 |
| rs568801  | 11 | PGR | 1.030 | 0.851 | 1.247 | 7.60E-01 |
| rs569723  | 11 | PGR | 0.970 | 0.830 | 1.134 | 7.05E-01 |
| rs569857  | 11 | PGR | 0.980 | 0.866 | 1.110 | 7.54E-01 |
| rs572402  | 11 | PGR | 1.018 | 0.960 | 1.078 | 5.54E-01 |
| rs572483  | 11 | PGR | 0.984 | 0.927 | 1.045 | 6.00E-01 |
| rs572580  | 11 | PGR | 1.039 | 0.982 | 1.099 | 1.84E-01 |
| rs572698  | 11 | PGR | 0.973 | 0.913 | 1.037 | 4.04E-01 |
| rs573094  | 11 | PGR | 0.994 | 0.899 | 1.100 | 9.14E-01 |
| rs574434  | 11 | PGR | 0.990 | 0.936 | 1.048 | 7.40E-01 |
| rs577615  | 11 | PGR | 0.998 | 0.940 | 1.061 | 9.56E-01 |
| rs578029  | 11 | PGR | 1.004 | 0.942 | 1.069 | 9.11E-01 |
| rs578938  | 11 | PGR | 0.979 | 0.922 | 1.039 | 4.89E-01 |
| rs581136  | 11 | PGR | 0.986 | 0.922 | 1.054 | 6.73E-01 |
| rs582691  | 11 | PGR | 0.948 | 0.885 | 1.017 | 1.36E-01 |
| rs588913  | 11 | PGR | 1.037 | 0.981 | 1.097 | 2.01E-01 |
| rs589447  | 11 | PGR | 0.983 | 0.925 | 1.044 | 5.70E-01 |
| rs590688  | 11 | PGR | 0.978 | 0.924 | 1.036 | 4.52E-01 |
| rs592080  | 11 | PGR | 1.036 | 0.980 | 1.096 | 2.11E-01 |
| rs596223  | 11 | PGR | 0.956 | 0.871 | 1.050 | 3.52E-01 |
| rs598873  | 11 | PGR | 1.012 | 0.942 | 1.086 | 7.49E-01 |
| rs600692  | 11 | PGR | 0.994 | 0.885 | 1.116 | 9.13E-01 |
| rs600764  | 11 | PGR | 0.982 | 0.921 | 1.046 | 5.72E-01 |
| rs601040  | 11 | PGR | 0.958 | 0.901 | 1.019 | 1.76E-01 |
| rs601046  | 11 | PGR | 1.016 | 0.956 | 1.079 | 6.13E-01 |
| rs601618  | 11 | PGR | 0.966 | 0.867 | 1.076 | 5.33E-01 |
| rs606789  | 11 | PGR | 0.988 | 0.933 | 1.045 | 6.68E-01 |
| rs610998  | 11 | PGR | 1.019 | 0.958 | 1.084 | 5.46E-01 |
| rs618032  | 11 | PGR | 1.020 | 0.963 | 1.080 | 5.03E-01 |
| rs619487  | 11 | PGR | 0.984 | 0.889 | 1.089 | 7.52E-01 |
| rs635320  | 11 | PGR | 0.982 | 0.918 | 1.050 | 5.92E-01 |
| rs635984  | 11 | PGR | 0.973 | 0.909 | 1.042 | 4.38E-01 |
| rs639838  | 11 | PGR | 1.033 | 0.976 | 1.093 | 2.64E-01 |
| rs647420  | 11 | PGR | 0.991 | 0.894 | 1.097 | 8.56E-01 |
| rs648838  | 11 | PGR | 0.989 | 0.875 | 1.118 | 8.62E-01 |
| rs650042  | 11 | PGR | 1.025 | 0.835 | 1.259 | 8.12E-01 |
| rs653752  | 11 | PGR | 0.996 | 0.943 | 1.052 | 8.95E-01 |
| rs660149  | 11 | PGR | 1.005 | 0.945 | 1.069 | 8.81E-01 |
| rs660541  | 11 | PGR | 1.053 | 0.985 | 1.126 | 1.32E-01 |
| rs660912  | 11 | PGR | 1.029 | 0.911 | 1.162 | 6.49E-01 |
| rs665617  | 11 | PGR | 1.001 | 0.935 | 1.073 | 9.73E-01 |
| rs666207  | 11 | PGR | 1.013 | 0.959 | 1.071 | 6.35E-01 |
| rs666553  | 11 | PGR | 1.003 | 0.936 | 1.075 | 9.23E-01 |
| rs667637  | 11 | PGR | 1.010 | 0.951 | 1.073 | 7.35E-01 |
| rs673943  | 11 | PGR | 1.045 | 0.851 | 1.284 | 6.74E-01 |
| rs679275  | 11 | PGR | 0.985 | 0.931 | 1.042 | 6.00E-01 |
| rs680670  | 11 | PGR | 0.995 | 0.876 | 1.131 | 9.43E-01 |
| rs694070  | 11 | PGR | 0.979 | 0.921 | 1.041 | 4.98E-01 |
| rs7102223 | 11 | PGR | 1.038 | 0.925 | 1.164 | 5.26E-01 |
| rs7106686 | 11 | PGR | 0.988 | 0.932 | 1.048 | 6.97E-01 |
| rs7115959 | 11 | PGR | 0.975 | 0.919 | 1.034 | 3.92E-01 |
| rs7116336 | 11 | PGR | 1.056 | 0.970 | 1.150 | 2.07E-01 |
| rs9282823 | 11 | PGR | 0.982 | 0.790 | 1.220 | 8.70E-01 |
| rs948516  | 11 | PGR | 0.976 | 0.889 | 1.072 | 6.15E-01 |

Abbreviations: SNP = single nucleotide polymorphism; CHR, chromosome;  
MEDIA = MEta-analysis of type 2 DIabetes in African Americans;  
OR = odds ratio; LCL = lower confidence limit; UCL = upper confidence limit.
