# Supplementary material
Source: PubMed Central journal article supplement (PMC5980699)
Supplement: NIHMS942459-supplement-Supp_TableS9.pdf [file NIHMS942459-supplement-Supp_TableS9.pdf]

Supplemental Table 9. SNPs in PGR among Trans-ethnic Populations in the DIAGRAM

| RS #       | CHR | Gene       | OR    | p        |
|------------|-----|------------|-------|----------|
| rs11224542 | 11  | <i>PGR</i> | 0.917 | 9.30E-02 |
| rs529808   | 11  | <i>PGR</i> | 0.971 | 9.70E-02 |
| rs639838   | 11  | <i>PGR</i> | 0.971 | 6.60E-02 |
| rs561610   | 11  | <i>PGR</i> | 0.980 | 1.10E-01 |
| rs523535   | 11  | <i>PGR</i> | 0.971 | 1.00E-01 |
| rs11571253 | 11  | <i>PGR</i> | 1.230 | 5.90E-02 |
| rs11571250 | 11  | <i>PGR</i> | 0.820 | 9.20E-02 |
| rs498370   | 11  | <i>PGR</i> | 0.962 | 8.20E-02 |
| rs535362   | 11  | <i>PGR</i> | 0.962 | 8.10E-02 |
| rs523630   | 11  | <i>PGR</i> | 0.962 | 8.10E-02 |
| rs660149   | 11  | <i>PGR</i> | 0.971 | 6.00E-02 |
| rs545845   | 11  | <i>PGR</i> | 0.971 | 5.40E-02 |
| rs534200   | 11  | <i>PGR</i> | 0.943 | 3.90E-03 |
| rs653752   | 11  | <i>PGR</i> | 0.971 | 1.60E-02 |
| rs508533   | 11  | <i>PGR</i> | 0.971 | 4.10E-02 |
| rs590688   | 11  | <i>PGR</i> | 1.020 | 8.70E-02 |
| rs520017   | 11  | <i>PGR</i> | 0.962 | 9.20E-02 |
| rs486992   | 11  | <i>PGR</i> | 0.971 | 4.50E-02 |
| rs485283   | 11  | <i>PGR</i> | 0.971 | 6.90E-02 |
| rs529359   | 11  | <i>PGR</i> | 0.971 | 6.20E-02 |
| rs4754732  | 11  | <i>PGR</i> | 0.971 | 1.00E-01 |
| rs521488   | 11  | <i>PGR</i> | 0.971 | 2.70E-02 |
| rs568157   | 11  | <i>PGR</i> | 0.962 | 1.80E-02 |
| rs610998   | 11  | <i>PGR</i> | 0.962 | 9.70E-03 |
| rs693202   | 11  | <i>PGR</i> | 0.962 | 1.70E-02 |

Abbreviations: SNP = single nucleotide polymorphism; CHR, chromosome;  
 DIAGRAM = DIAbetes Genetics Replication And Meta-analysis;  
 OR = odds ratio.
