# Supplementary material
Source: PubMed Central journal article supplement (PMC5980699)
Supplement: NIHMS942459-supplement-Supp_TableS10.pdf [file NIHMS942459-supplement-Supp_TableS10.pdf]

Supplemental Table 10. SNPs in PGR among Mexican populations in the SIGMA

| <b>RS #</b> | <b>CHR</b> | <b>Gene</b> | <b>OR</b> | <b>p</b> |
|-------------|------------|-------------|-----------|----------|
| rs11224542  | 11         | <i>PGR</i>  | 1.160     | 8.37E-02 |
| rs145583608 | 11         | <i>PGR</i>  | 0.753     | 5.19E-02 |
| rs573094    | 11         | <i>PGR</i>  | 1.060     | 1.27E-01 |
| rs528673    | 11         | <i>PGR</i>  | 1.060     | 1.26E-01 |
| rs647420    | 11         | <i>PGR</i>  | 1.060     | 1.28E-01 |
| rs11571271  | 11         | <i>PGR</i>  | 1.160     | 1.30E-01 |
| rs56935038  | 11         | <i>PGR</i>  | 0.788     | 1.34E-01 |
| rs578218    | 11         | <i>PGR</i>  | 0.943     | 1.25E-01 |
| rs637963    | 11         | <i>PGR</i>  | 0.943     | 1.22E-01 |
| rs522819    | 11         | <i>PGR</i>  | 0.944     | 1.28E-01 |
| rs582742    | 11         | <i>PGR</i>  | 0.944     | 1.29E-01 |
| rs551749    | 11         | <i>PGR</i>  | 0.944     | 1.27E-01 |
| rs524490    | 11         | <i>PGR</i>  | 0.944     | 1.29E-01 |
| rs632542    | 11         | <i>PGR</i>  | 0.944     | 1.30E-01 |
| rs493220    | 11         | <i>PGR</i>  | 0.936     | 8.25E-02 |
| rs476852    | 11         | <i>PGR</i>  | 0.944     | 1.30E-01 |
| rs142682016 | 11         | <i>PGR</i>  | 0.943     | 1.23E-01 |
| rs139922872 | 11         | <i>PGR</i>  | 0.941     | 1.08E-01 |
| rs619487    | 11         | <i>PGR</i>  | 0.943     | 1.22E-01 |
| rs560291    | 11         | <i>PGR</i>  | 0.943     | 1.22E-01 |
| rs480851    | 11         | <i>PGR</i>  | 0.943     | 1.22E-01 |
| rs493591    | 11         | <i>PGR</i>  | 0.943     | 1.23E-01 |
| rs472800    | 11         | <i>PGR</i>  | 0.943     | 1.21E-01 |
| rs485283    | 11         | <i>PGR</i>  | 0.944     | 1.30E-01 |
| rs375490710 | 11         | <i>PGR</i>  | 1.400     | 6.49E-02 |

Abbreviations: SNP = single nucleotide polymorphism; CHR, chromosome;  
 SIGMA = Slim Initiative in Genomic Medicine for the Americas;  
 OR = odds ratio.
